# Supplementary material for: The binding of lncRNA RP11-732M18.3 with 14-3-3 β/α accelerates p21 degradation and promotes glioma growth
Source: PubMed Central journal article supplement — eBioMedicine. 2019 Jun 13;45:58–69. doi: 10.1016/j.ebiom.2019.06.002 (PMC6642068; doi:10.1016/j.ebiom.2019.06.002), 2019-06-13

a.

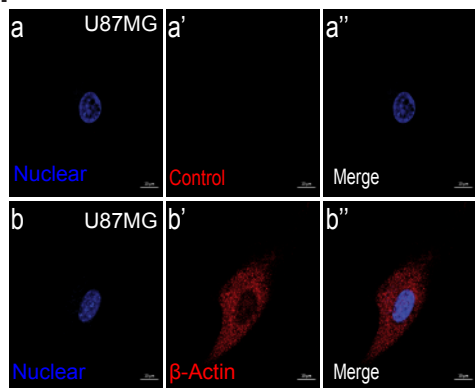

b.

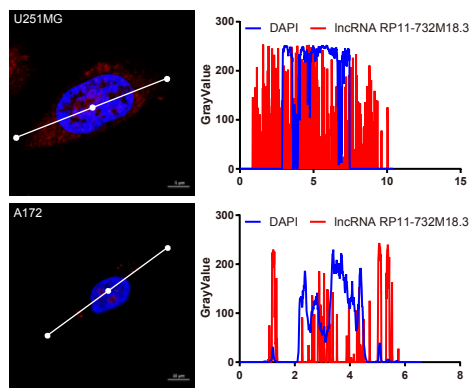

c.

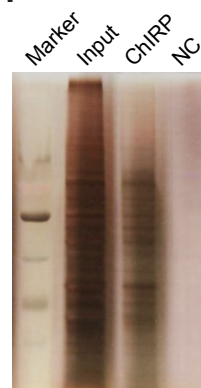

d.

| Biological process             | Fold enrichment | p-value   |
|--------------------------------|-----------------|-----------|
| Cytoskeletal anchoring         | 146.7273206     | 0.0068472 |
| Ion transport                  | 12.25529172     | 0.0792282 |
| Cell growth and/or maintenance | 4.147726573     | 0.0004997 |
| Metabolism                     | 1.734143431     | 0.1576305 |
| Energy pathways                | 1.430505441     | 0.3063742 |

e.

**1433B HUMAN** Mass: 28179 Score: 179 Matches: 8(6) Sequences: 6(5) emPAI: 0.95  
 14-3-3 protein beta/alpha OS=Homo sapiens GN=YWHAB PE=1 SV=3

Check to include this hit in error tolerant search or archive report

| Query                | Observed | Mr(expt)  | Mr(calc)  | ppm    | Miss | Score | Expect   | Rank | Unique | Peptide             |
|----------------------|----------|-----------|-----------|--------|------|-------|----------|------|--------|---------------------|
| <a href="#">494</a>  | 408.7145 | 815.4143  | 815.4137  | 0.80   | 0    | (9)   | 4.7      | 1    |        | K. LAEQAER. Y       |
| <a href="#">495</a>  | 408.7147 | 815.4148  | 815.4137  | 1.39   | 0    | 58    | 6.6e-005 | 1    |        | K. LAEQAER. Y       |
| <a href="#">1037</a> | 452.2619 | 902.5092  | 902.5073  | 2.18   | 0    | 38    | 0.0075   | 1    |        | R. VISSIEQK. T      |
| <a href="#">1074</a> | 454.2648 | 906.5151  | 906.5174  | -2.57  | 0    | 33    | 0.015    | 1    |        | R. NLLSVAYK. N      |
| <a href="#">1690</a> | 508.2165 | 1014.4184 | 1014.4150 | 3.30   | 0    | 47    | 9.5e-005 | 1    |        | R. YDDMAAMK. A      |
| <a href="#">2326</a> | 554.7722 | 1107.5298 | 1107.5495 | -17.82 | 0    | 1     | 26       | 4    |        | K. EMQPTHPIR. L     |
| <a href="#">4915</a> | 533.5872 | 1597.7397 | 1597.7332 | 4.04   | 0    | (60)  | 3.2e-005 | 1    | U      | K. AVTEQGHLSNEER. N |
| <a href="#">4916</a> | 799.8776 | 1597.7406 | 1597.7332 | 4.61   | 0    | 63    | 1.6e-005 | 1    | U      | K. AVTEQGHLSNEER. N |

f.

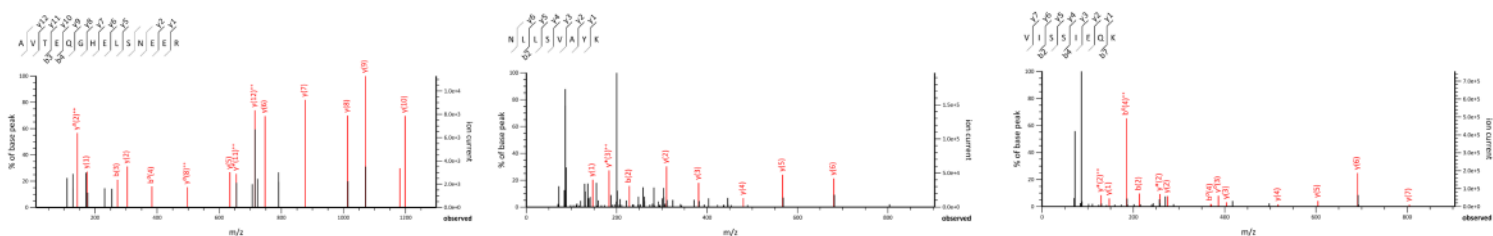

g.

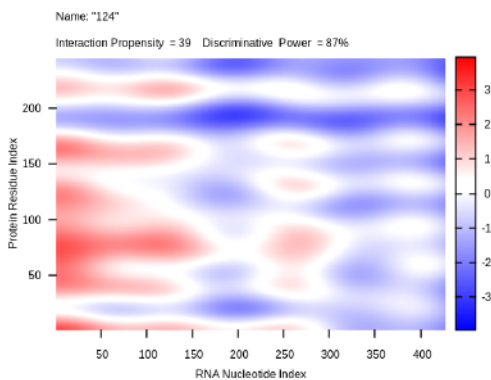

h.

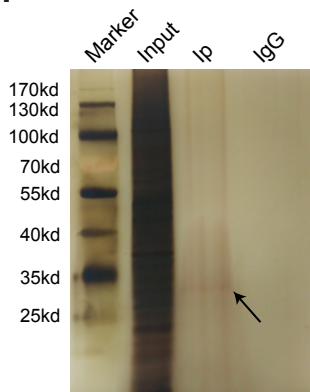

i.

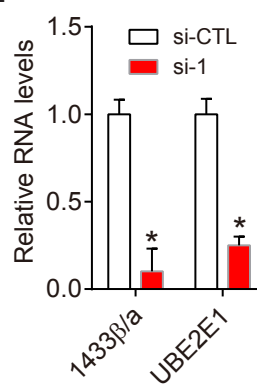

Supplement: mmc5.pdf [file mmc5.pdf]
