# Supplementary figures and images for: The binding of lncRNA RP11-732M18.3 with 14-3-3 β/α accelerates p21 degradation and promotes glioma growth
Source: PubMed Central journal article supplement — eBioMedicine. 2019 Jun 13;45:58–69. doi: 10.1016/j.ebiom.2019.06.002 (PMC6642068; doi:10.1016/j.ebiom.2019.06.002), 2019-06-13

a.

| Label | Strand | Frame | Start | Stop | Length (nt   aa) |
|-------|--------|-------|-------|------|------------------|
| ORF8  | -      | 2     | 225   | >1   | 225   74         |
| ORF7  | -      | 1     | 253   | 110  | 144   47         |
| ORF6  | -      | 1     | 400   | 272  | 129   42         |
| ORF5  | +      | 3     | 306   | >422 | 117   38         |
| ORF4  | +      | 2     | 329   | 385  | 57   18          |
| ORF1  | +      | 1     | 157   | 204  | 48   15          |
| ORF3  | +      | 2     | 194   | 229  | 36   11          |
| ORF2  | +      | 1     | 385   | 417  | 33   10          |

b.

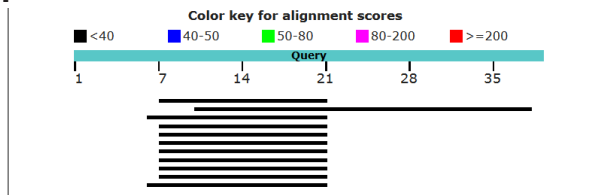

d.

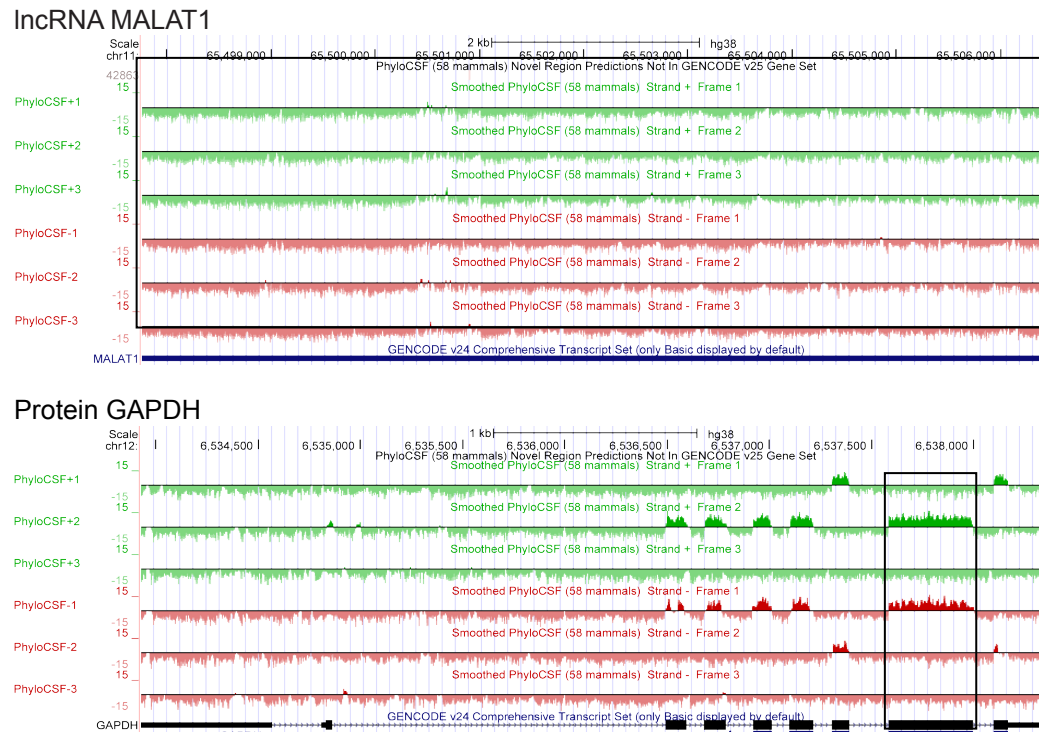

c.

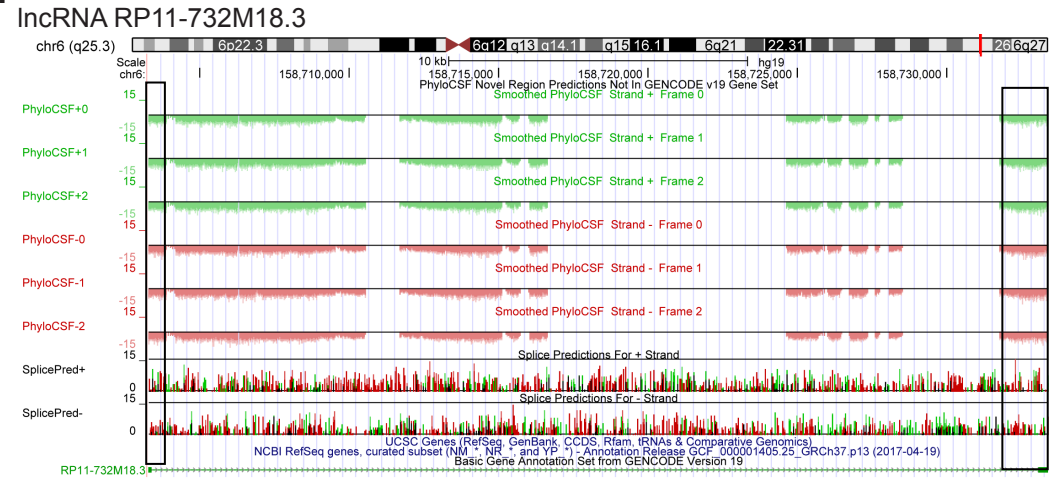

e.

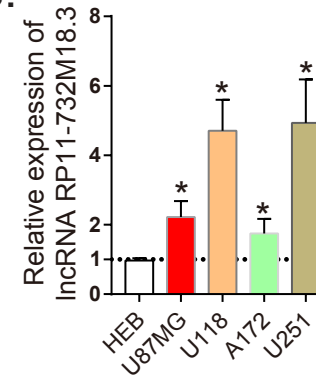

f.

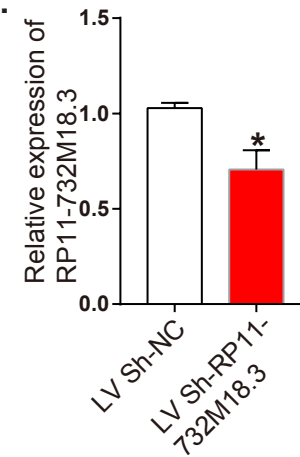

Supplement: mmc1.pdf [file mmc1.pdf]

**a.**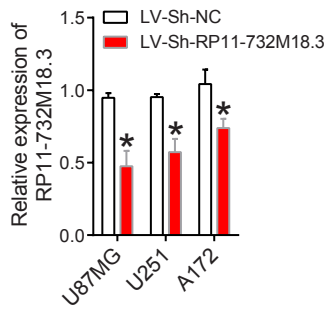**b.**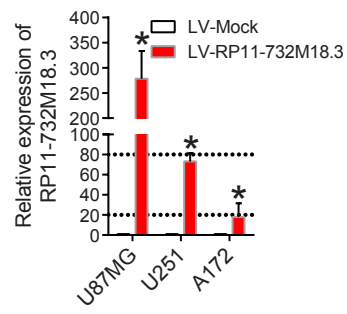**c.**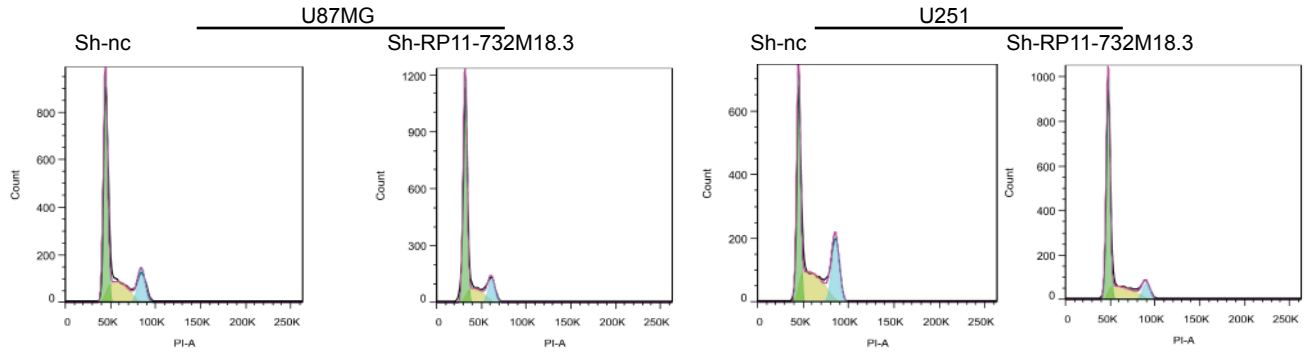**d.**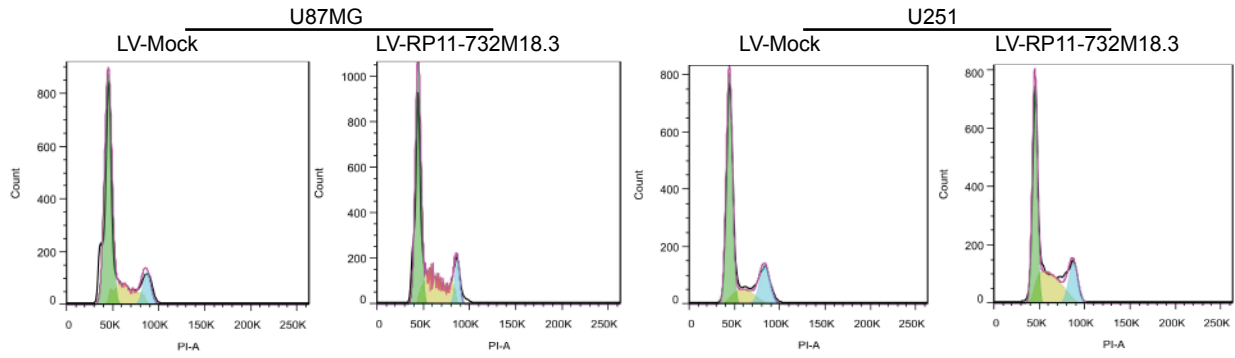

Supplement: mmc2.pdf [file mmc2.pdf]

a.

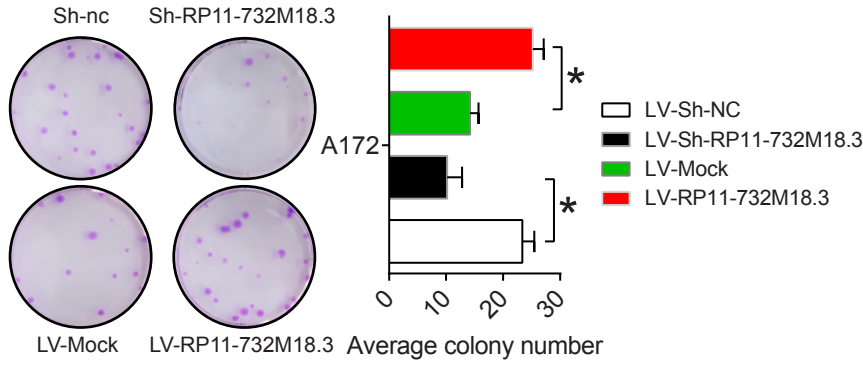

b.

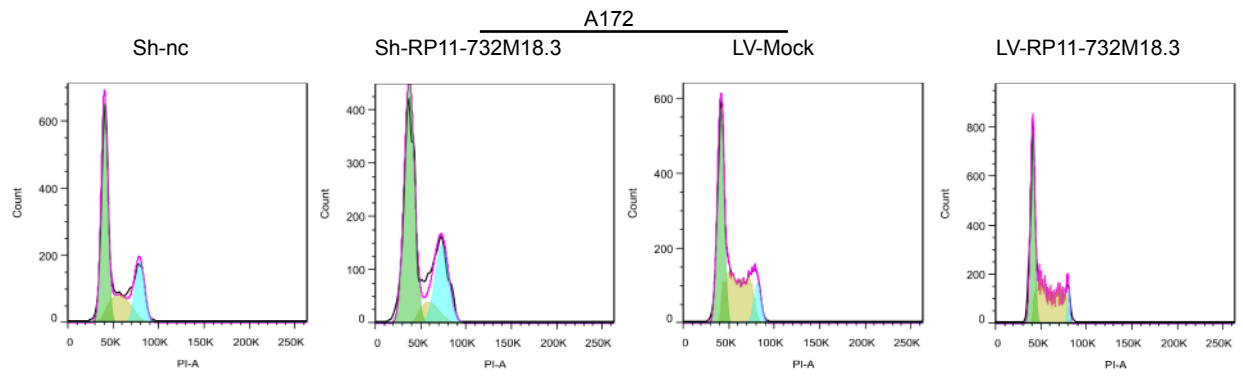

c.

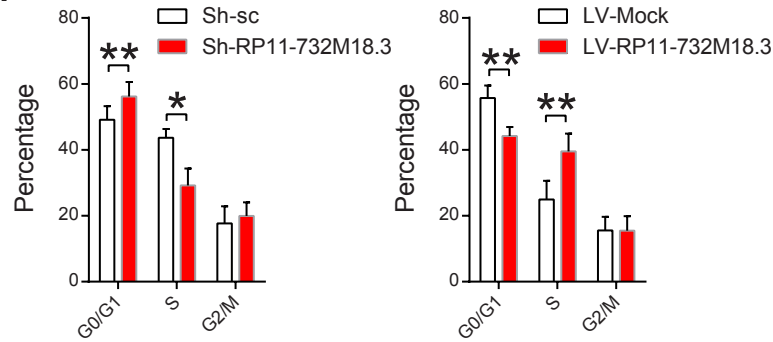

d.

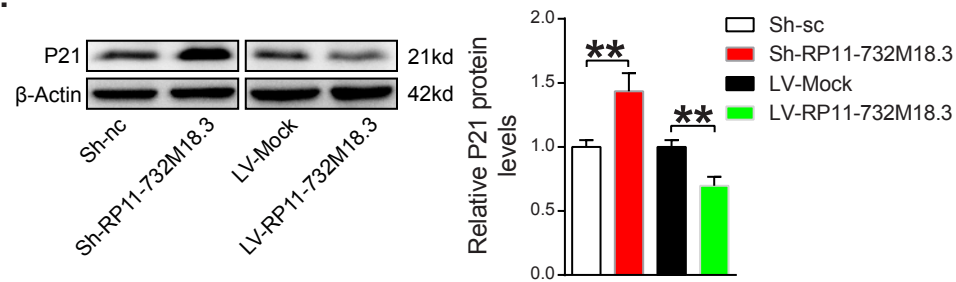

Supplement: mmc3.pdf [file mmc3.pdf]

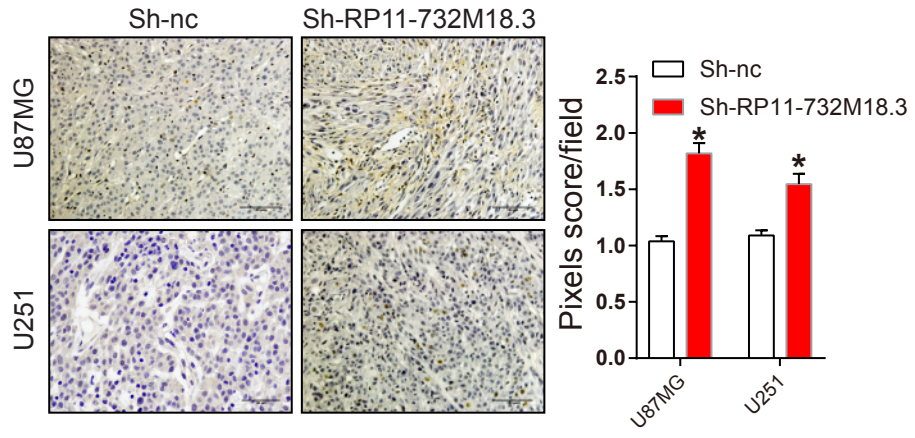

Supplement: mmc4.pdf [file mmc4.pdf]
